# Supplementary material for: Synthesis, structure and long-lived NIR luminescence of lanthanide ate complexes with perfluorinated 2-mercaptobenzothiazole
Source: Royal Society of Chemistry journal article supplement (doi:10.1039/c8dt04601h), 2018-12-20
Supplement: c8dt04601h1.pdf [file c8dt04601h1.pdf]

## Supplementary materials

### Synthesis, structure and long-lived NIR luminescence of lanthanide ate complexes with perfluorinated 2-mercaptobenzothiazole

Vasily A. Ilichev,<sup>\*a</sup> Lubov I. Silantieva,<sup>a</sup> Artem N. Yablonskiy,<sup>b</sup> Boris A. Andreev,<sup>b</sup> Roman V. Rumyantsev,<sup>a</sup> Georgy K. Fukin<sup>a</sup> and Mikhail N. Bochkarev<sup>a</sup>

<sup>a</sup> G. A. Razuvaev Institute of Organometallic Chemistry of Russian Academy of Sciences, Tropinina 49, 603950 Nizhny Novgorod, Russian Federation

<sup>b</sup> Institute for Physics of Microstructures of Russian Academy of Sciences, 7 ul. Akademicheskaya, 603950 Nizhny Novgorod, Russian Federation

\*Corresponding author. E-mail: [ilichev@iomc.ras.ru](mailto:ilichev@iomc.ras.ru) (V.A.I.)

**Table 1S.** Details of crystallographic, collection and refinement data for **1 – 3, 6**.

| Complex                                         | <b>1</b>                                                                                             | <b>2</b>                                                                                             | <b>3</b>                                                                                             | <b>6</b>                                                                                             |
|-------------------------------------------------|------------------------------------------------------------------------------------------------------|------------------------------------------------------------------------------------------------------|------------------------------------------------------------------------------------------------------|------------------------------------------------------------------------------------------------------|
| Empirical formula                               | C <sub>40</sub> H <sub>30</sub> F <sub>16</sub> N <sub>4</sub> Na<br>NdO <sub>6</sub> S <sub>8</sub> | C <sub>40</sub> H <sub>30</sub> F <sub>16</sub> N <sub>4</sub> Na<br>SmO <sub>6</sub> S <sub>8</sub> | C <sub>40</sub> H <sub>30</sub> F <sub>16</sub> N <sub>4</sub> Na<br>TbO <sub>6</sub> S <sub>8</sub> | C <sub>40</sub> H <sub>30</sub> F <sub>16</sub> N <sub>4</sub> Li<br>YbO <sub>6</sub> S <sub>8</sub> |
| Formula weight                                  | 1390.39                                                                                              | 1396.50                                                                                              | 1405.07                                                                                              | 1403.14                                                                                              |
| Temperature [K]                                 | 100(2)                                                                                               | 100(2)                                                                                               | 100(2)                                                                                               | 100(2)                                                                                               |
| Crystal system                                  | Monoclinic                                                                                           | Monoclinic                                                                                           | Monoclinic                                                                                           | Monoclinic                                                                                           |
| Space group                                     | P2 <sub>1</sub> /n                                                                                   | P2 <sub>1</sub> /n                                                                                   | P2(1)/n                                                                                              | P2(1)/n                                                                                              |
| Unit cell dimensions                            |                                                                                                      |                                                                                                      |                                                                                                      |                                                                                                      |
| a[Å]                                            | 14.2673(4)                                                                                           | 14.2403(7)                                                                                           | 15.6988(5)                                                                                           | 13.8956(8)                                                                                           |
| b[Å]                                            | 32.3497(9)                                                                                           | 32.3402(15)                                                                                          | 20.5029(7)                                                                                           | 32.1223(17)                                                                                          |
| c[Å]                                            | 23.1902(6)                                                                                           | 23.1367(11)                                                                                          | 16.0116(7)                                                                                           | 23.7949(14)                                                                                          |
| α[°]                                            | 90                                                                                                   | 90                                                                                                   | 90                                                                                                   | 90                                                                                                   |
| β[°]                                            | 100.0860(10)                                                                                         | 100.2170(10)                                                                                         | 91.6090(10)                                                                                          | 106.296(2)                                                                                           |
| γ[°]                                            | 90                                                                                                   | 90                                                                                                   | 90                                                                                                   | 90                                                                                                   |
| Volume [Å <sup>3</sup> ]                        | 10537.9(5)                                                                                           | 10486.3(9)                                                                                           | 5151.6(3)                                                                                            | 10194.4(10)                                                                                          |
| Z                                               | 8                                                                                                    | 8                                                                                                    | 4                                                                                                    | 8                                                                                                    |
| Calculated density [Mg/m <sup>3</sup> ]         | 1.753                                                                                                | 1.769                                                                                                | 1.812                                                                                                | 1.828                                                                                                |
| Absorption coefficient [mm <sup>-1</sup> ]      | 1.416                                                                                                | 1.552                                                                                                | 1.813                                                                                                | 2.271                                                                                                |
| F(000)                                          | 5512                                                                                                 | 5528                                                                                                 | 2776                                                                                                 | 5528                                                                                                 |
| Crystal size [mm <sup>3</sup> ]                 | 0.24×0.17×0.11                                                                                       | 0.44×0.33×0.18                                                                                       | 0.12×0.08×0.04                                                                                       | 0.20×0.15×0.04                                                                                       |
| θ [°]                                           | 1.936 - 27.000                                                                                       | 2.188 - 27.000                                                                                       | 2.359 - 29.000                                                                                       | 1.902 - 25.030                                                                                       |
| Reflections collected / unique                  | 122590 / 22994                                                                                       | 113916 / 22884                                                                                       | 64235 / 13621                                                                                        | 118646 / 18191                                                                                       |
| R(int)                                          | 0.0515                                                                                               | 0.0324                                                                                               | 0.0491                                                                                               | 0.0635                                                                                               |
| Final R indices [I>2σ(I)]                       | R <sub>1</sub> =0.0429,<br>wR <sub>2</sub> =0.0796                                                   | R <sub>1</sub> =0.0286,<br>wR <sub>2</sub> =0.0569                                                   | R <sub>1</sub> =0.0343,<br>wR <sub>2</sub> =0.0648                                                   | R <sub>1</sub> =0.0684,<br>wR <sub>2</sub> =0.1869                                                   |
| R indices (all data)                            | R <sub>1</sub> =0.0578,<br>wR <sub>2</sub> =0.0831                                                   | R <sub>1</sub> =0.0348,<br>wR <sub>2</sub> =0.0584                                                   | R <sub>1</sub> =0.0485,<br>wR <sub>2</sub> =0.0678                                                   | R <sub>1</sub> =0.0834,<br>wR <sub>2</sub> =0.2098                                                   |
| S                                               | 1.076                                                                                                | 1.089                                                                                                | 1.066                                                                                                | 1.042                                                                                                |
| Largest diff. peak and hole [e/Å <sup>3</sup> ] | 0.962/-1.046                                                                                         | 0.780/-0.662                                                                                         | 1.187/-1.594                                                                                         | 3.473/-2.986                                                                                         |

**Table 2S.** Selected bond lengths (Å) and angles (°) in the complexes **1 – 3, 6**.

| Distances and Angles                  | <b>1</b> (Ln = Nd)        | <b>2</b> (Ln = Sm)         | <b>3</b> (Ln = Tb)       | <b>4</b> (Ln = Yb)       |
|---------------------------------------|---------------------------|----------------------------|--------------------------|--------------------------|
| Ln-S, Å                               | 2.8634(10) -<br>2.8961(9) | 2.8346(6) -<br>2.8671(6)   | 2.8325(7) -<br>2.8417(7) | 2.770(3) -<br>2.795(3)   |
| Ln-N, Å                               | 2.564(3) -<br>2.612(3)    | 2.5343(18) -<br>2.5863(18) | 2.501(2) -<br>2.543(2)   | 2.455(10) -<br>2.480(10) |
| N <sup>L</sup> -Ln-S <sup>L</sup> , ° | 57.64(6) -<br>58.42(7)    | 58.16(4) -<br>58.93(5)     | 59.16(5) -<br>59.32(5)   | 59.6(3) -<br>60.6(2)     |
